# Supplementary material for: Personalized neoantigen vaccine prevents postoperative recurrence in hepatocellular carcinoma patients with vascular invasion
Source: PubMed Central journal article supplement (PMC8667400; doi:10.1186/s12943-021-01467-8), 2021-12-13

# Supplementary Figure S6

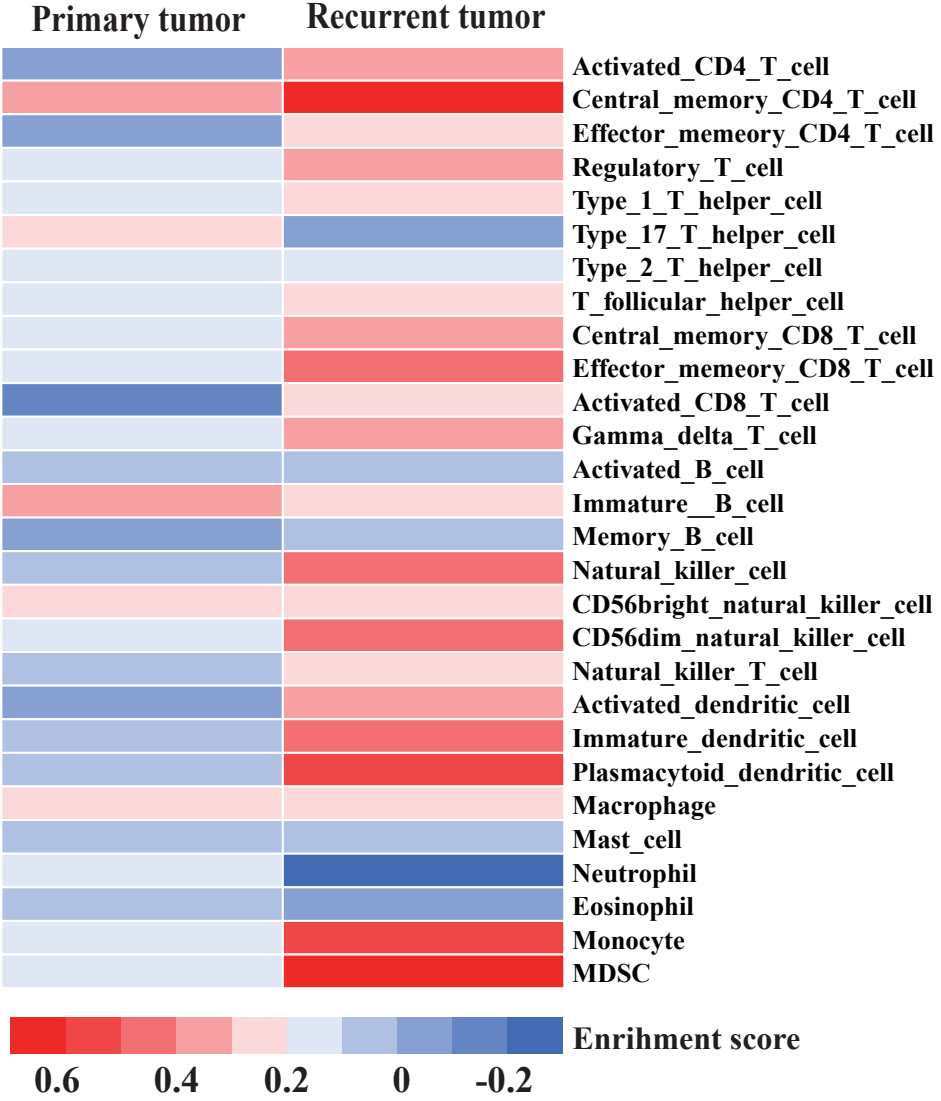

Supplement: 12943_2021_1467_MOESM7_ESM.pdf [file 12943_2021_1467_MOESM7_ESM.pdf]
