# Supplementary material for: Personalized neoantigen vaccine prevents postoperative recurrence in hepatocellular carcinoma patients with vascular invasion
Source: PubMed Central journal article supplement (PMC8667400; doi:10.1186/s12943-021-01467-8), 2021-12-13
Supplement: 12943_2021_1467_MOESM8_ESM.pdf [file 12943_2021_1467_MOESM8_ESM.pdf]

# Supplementary Figure S7

## N09

█ APOB 195R/G  
█ ARHGAP40 237L/Q  
█ C7orf34 59D/E  
█ CACNA2D1 584G/E  
█ CCDC33 282S/Y  
█ CVP2A7 68V/M  
█ DNAB1 1580A/A  
█ ELAVL2 332R/S  
█ ENTPD4 258Q/  
█ FCGBP 358A/S  
█ FLT4 820G/E  
█ GABRA1 79F/H  
█ HELZ2 641T/S  
█ HIVP2 932A/S  
█ IRGC 89V/I  
█ KANK4 404K/I  
█ MS4A13 70R/C  
█ OR52L1 230L/R  
█ OR5B12 191F/T  
█ PAPPA 1236A/S  
█ PEG3 419G/V  
█ PENK 85S/R  
█ PIK3CD 214L/Q  
█ PLD1 79V/L  
█ PTPRR2 48A/Y  
█ ROR1 878Q/R  
█ SLC7A11 322F/L  
█ SPATA18 479C/S  
█ SPHKAP 435T/A  
█ TPE3 285E/V  
█ TSHZ2 42S/A  
█ UGT1A3 109K/Q  
█ USP6 396F/L  
█ ZNF521 159R/L  
█ ZNF813 396F/L

## N22

█ ADRA1D 4R/C  
█ ASTN1 1008T/I  
█ C5orf49 132D/H  
█ CCL8 6A/V  
█ CEP350 313A/G  
█ C11orf159  
█ COL6A5 1508K/M  
█ CTD-2287016  
█ CTSG 42N/C  
█ DENND2A 985E/D  
█ EYAA4 310V/S  
█ FAM17 369S/T  
█ GALNT7 338F/V  
█ GLI3 733T/N  
█ HDRI 263K/Q  
█ LTBPA 1290V/A  
█ MLK4 88C/V  
█ MME 232V/C  
█ MPP1 329K/N  
█ MUTYH 171G/R  
█ PDGFRL 301V/E  
█ PHIC3 429Q/L  
█ PHF3 834S/P  
█ PTEN 120A/E  
█ RBM11 281V/F  
█ RPS27 14E/Q  
█ TCEAL6 70G/C  
█ THSD7B 97F/L  
█ UGT2B15 301G/V  
█ YBEY 75C/R  
█ ZNF524 80G/D  
█ ZNF641 120L/L

## N13

█ ABCA1 355C/G  
█ ABCA13 367Q/K  
█ ADAMTSL1 755C/Y  
█ ADARB2 351R/S  
█ ALMS1 3399Q/L  
█ ARHGE10 1171R/G  
█ ARMCK2 170A/V  
█ BBOX1 30P/L  
█ CAMSAP3 439R/S  
█ CNBP3 247V/L  
█ CEPT128 259Q/H  
█ CHIL1 389N/K  
█ CUBP1A 1121G/D  
█ CNB2 553F/T  
█ CRELD1 259D/H  
█ CRYG4 19C/F  
█ DCLC1 416V/N  
█ DEFB19 121P/L  
█ DYSF 1999D/E  
█ EMCN 124P/S  
█ EPHA10 84W/R  
█ FBR3 443A/T  
█ FLJWC11 77A/S  
█ FOXM2 381G/E  
█ PDM1 66A/D  
█ FXYP25 155V/I  
█ GPR75 141L/Q  
█ HADHA 535V/A  
█ HCL51 211G/S  
█ HIFI1 11E/G  
█ IFT122 567A/S  
█ IGSF10 1024S/R  
█ ILVBL 486R/H  
█ IRXN5 428P/T  
█ ITGA7 114M/V  
█ KALRN 841D/E  
█ KND1 98L/Q  
█ KCTD1 535A/T  
█ KRTPA4-2 109T/A  
█ LRRCC7 485T/K  
█ MAGEE1 934R/W  
█ MCTP2 277R/K  
█ MGAT3 410S/N  
█ MPM26 36F/L  
█ MRC2 1072G/V  
█ MRPL4 347W/C  
█ MSA6A 162V/A  
█ MUC12 56S/L  
█ MUC17 3309S/I  
█ NUP188 376T/A  
█ PCDH16 289V/I  
█ PCLO 4437I/Q  
█ PFG3 930R/C  
█ PKHD1L1 2519V/F  
█ RASAB4 639R/L  
█ RHD 171H/Q  
█ ROBO1 1480D/G  
█ SACS 289K/T  
█ SCEL 53E/K  
█ SDK2 1970H/H  
█ SP8 221S/Y  
█ SPECC1 782A/T  
█ STAB2 225C/R  
█ SYDE2 263K/C  
█ SYNE1 824D/N  
█ SYTL1 510I/Q  
█ TMEM308 349D/E  
█ TSP3 249R/S  
█ TRPM2 499F/L  
█ TTN 368Q/P  
█ UNC93 25P/T  
█ WDFY4 1210A/T  
█ WDFY4 1210S/R  
█ XIRP2 233G/V  
█ ZNF516 924G/A  
█ ZNF860 108W/H

## N27

█ ABCY7 451L/Q  
█ AINAK2 946K/N  
█ AK9 850R/R  
█ ANKK1 372Q/L  
█ ARAP2 237Q/L  
█ ARHGAP40 349R/W  
█ ARL13A 255W/R  
█ ASHC2 107L/Q  
█ ASPSCR1 190S/L  
█ C4orf40 61S/C  
█ CACNA1E 804G/E  
█ CALCOEC1 553G/S  
█ CCDC38C 969K/I  
█ CDSL 87Q/L  
█ CDHR1 186H/L  
█ CNTNAP1 327V/E  
█ COL24A1 195Q/P  
█ CPNE6 458R/S  
█ CSMD3 1146N/K  
█ CUBN 486S/R  
█ DEFB129 169I/T  
█ DLX6 186W/R  
█ DNAH10 3214K/R  
█ DNAH5 814E/D  
█ EGLN3 283A/T  
█ EPBA13 1076K/N  
█ EPHA6 399E/V  
█ FAM196B 301C/S  
█ FAM47B 265K/M  
█ FAXC 191T/I  
█ GPR 145L/Q  
█ GRM5 912N/I  
█ HEYL 313M/L  
█ IGVYD-8 17L/R  
█ KCNA3 239V/E  
█ KCNC4 68R/W  
█ KCNK16 228A/S  
█ KCNQ3 348A/E  
█ KRTPA1-3 85C/S  
█ LHX1 298Q/L  
█ LRRCC3B 223V/F  
█ MATK 290R/H  
█ MMD2 1808W/V  
█ MUC16 6007F/T  
█ MUC16 7244L/Q  
█ NLRP2 1007S/C  
█ NLRP2 536I/H  
█ NRH14 482Q/L  
█ NR4A2 340C/V  
█ NRXN2 727E/V  
█ NTSR2 228V/F  
█ NUP210L 1127N/K  
█ OPRM1 80L/Q  
█ OR2M4 175H/L  
█ OR6C70 243M/L  
█ OTOA 789Q/H  
█ PAK7 212V/F  
█ PATE4 29I/K  
█ PAX2 357V/N  
█ PLAU 243C/S  
█ PLXNC1 335T/R  
█ PRTG 36F/I  
█ PS6G 214V/F  
█ PTG6 470D/V  
█ PTPN13 59I/Q  
█ PSDNL 1436C/S  
█ RBP2 116L/Q  
█ RCG9 180L/R  
█ SIFRS 71M/L  
█ SGOL2 84K/N  
█ SHC4 185L/Q  
█ SPTA1 1421D/E  
█ SPTB 1679A/T  
█ STARD9 1543N/Y  
█ TCTN1 244E/D  
█ TDRD5 221F/L  
█ TREML2 175L/F  
█ UBXN10 106Q/L  
█ VCAN 1632R/C  
█ ZCCAH 49E/V  
█ ZNF229 353R/K  
█ ZNF331 89L/H  
█ ZNF611 196I/T

## N06

█ ADAMTSL19 506M/V  
█ ADAMTSL5 806M/T  
█ AHNK2 2516D/E  
█ BOC 103R/Q  
█ BRD2 10A/S  
█ C1orf222 759C/S  
█ CACNA1E 1209R/Q  
█ CAMKY 50H/Y  
█ CHSY1 9W/G  
█ DACH2 146L/F  
█ DENND2A 732R/S  
█ EIF2S3 456D/D  
█ ERCC2 683A/S  
█ FAAH2 297D/G  
█ FAM230A 73I/V  
█ FLG 3359Q/E  
█ FOXB2 362M/T  
█ GABRR3 222S/A  
█ GLI2 353V/M  
█ HFM1 191V/E  
█ IRS4 90H/I  
█ NCAN 200E/D  
█ OBSCN 5894G/D  
█ OHSW2 213C/V  
█ OR8K3 232G/C  
█ OR8K3 232G/R  
█ P2RY14 206V/H  
█ PDRG1 92R/W  
█ PKPNT 125I/T  
█ RAPEGE1 153F/S  
█ RVR2 3910R/Q  
█ SCAP 178W/C  
█ SH3KBP1 398D/E  
█ SLCA2 7 248D/E  
█ TRPM3 1512P/L  
█ TSHN 53T/I  
█ TTC9B 249R/G  
█ ZNF469 1814H/Q  
█ ZNF99 559K/N

## N30

█ CRELD2 249N/S  
█ IRS2 1171R/H  
█ ML1 103H/I  
█ NPHS1 861F/L  
█ RPS2 139L/R

█ Other somatic mutations

█ Detected in ctDNA

█ No detected in ctDNA
